# Supplementary material
Source: PubMed Central journal article supplement (PMC5604337)

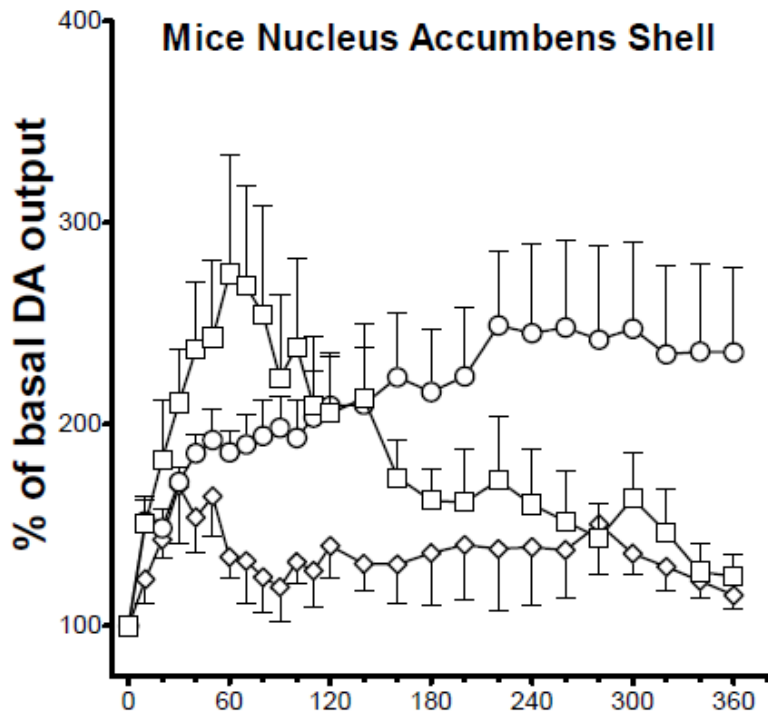

**Supplemental Figure 1.**

**Effects of modafinil**

**suspended in Arabic Gum**

**Vehicle and administered i.p.**

**on stimulation of DA levels**

**in dialysates from the**

**nucleus Accumbens shell and**

**nucleus Accumbens core in**

**Swiss-Webster mice.**

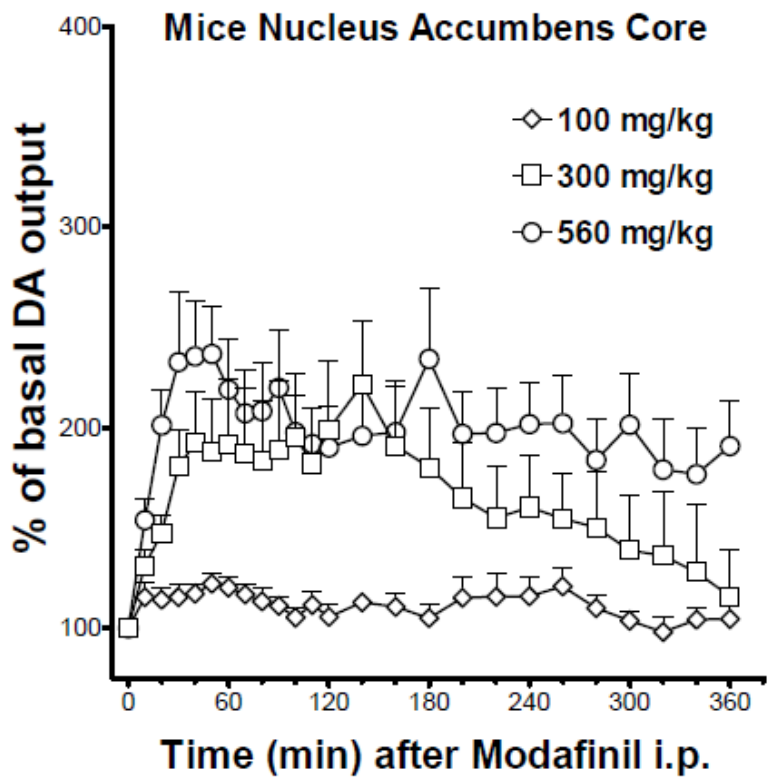

Supplement: NIHMS882376-supplement-suppl_Fig_1.pdf [file NIHMS882376-supplement-suppl_Fig_1.pdf]
